# Supplementary material
Source: MDPI journal article supplement (https://www.mdpi.com/2075-163X/12/12/1609)
Supplement: s1 [file s1]

Article

# Uranium Mineralization in the MacInnis Lake Area, Nonacho Basin, Northwest Territories: Potential Linkages to Metasomatic Iron Alkali-Calcic Systems

Kerstin Landry <sup>1</sup>, Erin Adlakha <sup>1,\*</sup>, Andree Roy-Garand <sup>1</sup>, Anna Terekhova <sup>1</sup>, Jacob Hanley <sup>1</sup>, Hendrik Falck <sup>2</sup> and Edith Martel <sup>2</sup>

<sup>1</sup> Department of Geology, Saint Mary's University, 923 Robie St., Halifax, NS B3H 3C3, Canada

<sup>2</sup> Northwest Territories Geological Survey, 4601-B 52 Avenue, Yellowknife, NT X1A 1K3, Canada

\* Correspondence: erin.adlakha@smu.ca

## Supplementary Materials

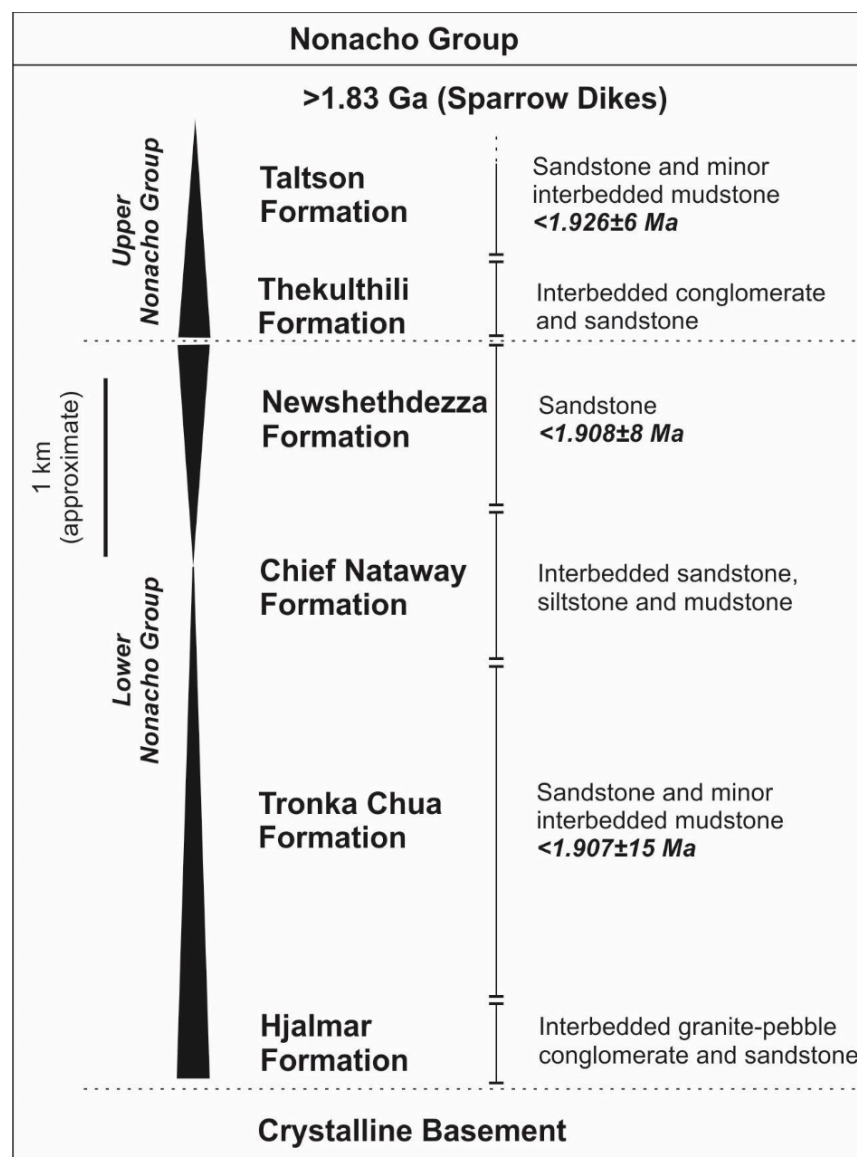

**Figure S1.** Generalized stratigraphic sequence of the Nonacho Group sediments after [34]. Vertical black bars reflect relative grain size variation (fining and coarsening upward sequences) with divisions into lower and upper Nonacho Group. Dashed lines indicate the stratigraphic location of unconformities. Minimum ages for select units are measured from youngest detrital zircons [33]. Absolute maximum age for Nonacho Group sediments is constricted by the 1.83 Ga Sparrow Dikes [37]. Figure modified after [29,33].

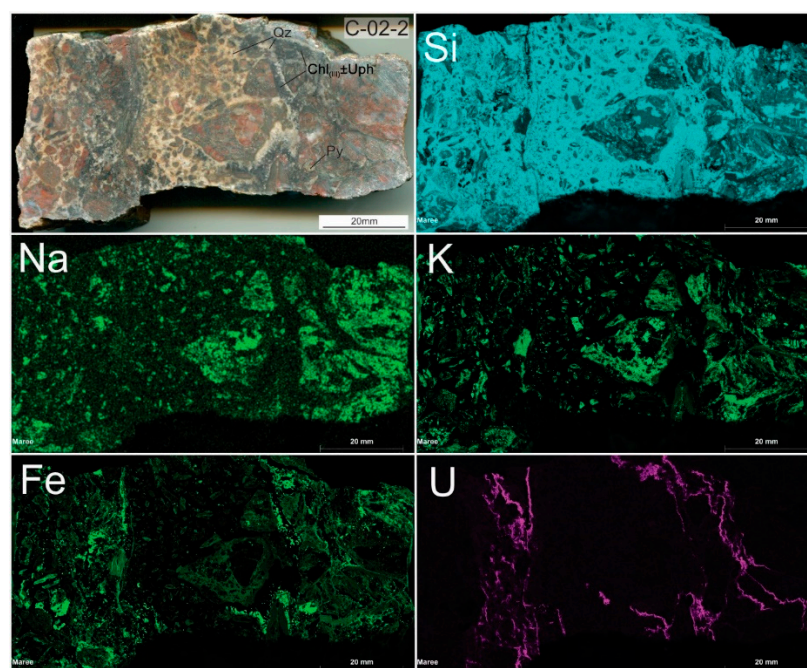

**Figure S2.** XRF false-colour elemental maps from sample C-02-2, a uranophane (Uph) mineralized quartz (Qz) breccia at the Cole occurrence. Abbreviations: chlorite (Chl), pyrite (Py).

**Table S1.** Abundance of major oxides in chlorite (wt.%) and their atomic proportions (based on 14O) from Type-III and Type-IV chlorite at MacInnis Lake occurrences, used to determine temperature (T in °C).

| Showing<br>Sample      | Cole                           |       |       |       |       |       | Welch    |       |       |       |       |       |       |       | Kult-82 |       |       |        |       |       |       |       |       |       |
|------------------------|--------------------------------|-------|-------|-------|-------|-------|----------|-------|-------|-------|-------|-------|-------|-------|---------|-------|-------|--------|-------|-------|-------|-------|-------|-------|
|                        | C-02-2                         |       |       |       |       |       | W-01-1 1 |       |       |       |       |       |       |       | K82-C1  |       |       | K82-05 |       |       |       |       |       |       |
| ap-<br>fu <sup>a</sup> | SiO <sub>2</sub>               | 25.35 | 25.60 | 25.68 | 25.56 | 25.44 | 25.85    | 25.82 | 25.58 | 25.31 | 26.91 | 25.36 | 25.87 | 25.95 | 26.11   | 25.56 | 25.44 | 25.85  | 25.46 | 25.40 | 25.25 | 25.76 | 25.62 | 25.39 |
|                        | TiO <sub>2</sub>               | 0.06  | 0.09  | 0.09  | 0.02  | 0.08  | 0.07     | 0.08  | 0.18  | 0.11  | 0.12  | 0.10  | 0.08  | 0.04  | 0.05    | 0.02  | 0.08  | 0.07   | 0.08  | 0.09  | 0.11  | 0.15  | 0.10  | 0.10  |
|                        | Al <sub>2</sub> O <sub>3</sub> | 19.51 | 19.27 | 19.19 | 18.94 | 18.75 | 18.85    | 18.17 | 18.49 | 18.36 | 18.25 | 18.29 | 17.84 | 18.37 | 18.21   | 18.94 | 18.75 | 18.85  | 19.00 | 18.75 | 18.95 | 18.98 | 18.80 | 19.03 |
|                        | Cr <sub>2</sub> O <sub>3</sub> | 0.00  | 0.00  | 0.02  | 0.03  | 0.01  | 0.00     | 0.00  | 0.05  | 0.00  | 0.00  | 0.04  | 0.05  | 0.04  | 0.06    | 0.03  | 0.01  | 0.00   | 0.02  | 0.00  | 0.01  | 0.00  | 0.00  | 0.01  |
|                        | NiO                            | 0.00  | 0.00  | 0.00  | 0.00  | 0.01  | 0.00     | 0.00  | 0.00  | 0.02  | 0.00  | 0.03  | 0.00  | 0.01  | 0.00    | 0.01  | 0.00  | 0.00   | 0.00  | 0.00  | 0.03  | 0.02  | 0.01  | 0.00  |
|                        | FeO                            | 34.99 | 34.67 | 35.81 | 36.02 | 35.75 | 35.47    | 35.92 | 35.68 | 36.15 | 31.38 | 38.01 | 34.75 | 35.19 | 32.80   | 36.02 | 35.75 | 35.47  | 36.27 | 36.70 | 37.33 | 36.41 | 36.05 | 36.82 |
|                        | MnO                            | 0.57  | 0.63  | 0.61  | 0.57  | 0.63  | 0.59     | 1.66  | 1.72  | 1.64  | 2.19  | 1.15  | 1.65  | 1.71  | 2.39    | 0.57  | 0.63  | 0.59   | 0.62  | 0.57  | 0.57  | 0.58  | 0.60  | 0.60  |
|                        | MgO                            | 9.21  | 9.35  | 8.80  | 8.23  | 8.51  | 8.57     | 8.19  | 8.09  | 7.97  | 10.10 | 6.86  | 9.04  | 7.94  | 9.64    | 8.23  | 8.51  | 8.57   | 8.29  | 8.01  | 7.61  | 8.08  | 8.35  | 7.72  |
|                        | CaO                            | 0.01  | 0.02  | 0.00  | 0.00  | 0.03  | 0.04     | 0.00  | 0.01  | 0.04  | 0.00  | 0.00  | 0.00  | 0.00  | 0.00    | 0.00  | 0.02  | 0.00   | 0.03  | 0.02  | 0.03  | 0.02  | 0.04  | 0.01  |
|                        | Na <sub>2</sub> O              | 0.04  | 0.05  | 0.00  | 0.15  | 0.17  | 0.19     | 0.00  | 0.00  | 0.01  | 0.00  | 0.00  | 0.00  | 0.00  | 0.00    | 0.00  | 0.15  | 0.17   | 0.19  | 0.11  | 0.17  | 0.07  | 0.20  | 0.10  |
| T                      | K <sub>2</sub> O               | 0.00  | 0.02  | 0.00  | 0.07  | 0.04  | 0.04     | 0.01  | 0.02  | 0.00  | 0.08  | 0.00  | 0.02  | 0.09  | 0.02    | 0.07  | 0.04  | 0.04   | 0.04  | 0.05  | 0.03  | 0.02  | 0.00  | 0.01  |
|                        | SrO                            | 0.00  | 0.00  | 0.00  | 0.00  | 0.00  | 0.00     | 0.00  | 0.10  | 0.00  | 0.00  | 0.00  | 0.00  | 0.00  | 0.00    | 0.00  | 0.00  | 0.00   | 0.00  | 0.05  | 0.00  | 0.00  | 0.00  | 0.00  |
|                        | F                              | 0.60  | 0.00  | 0.00  | 0.00  | 0.00  | 0.00     | 0.00  | 0.20  | 0.00  | 0.00  | 0.00  | 0.00  | 0.10  | 0.00    | 0.00  | 0.00  | 0.00   | 0.00  | 0.00  | 0.30  | 0.00  | 0.20  | 0.20  |
|                        | Cl                             | 0.00  | 0.01  | 0.01  | 0.02  | 0.01  | 0.00     | 0.00  | 0.01  | 0.01  | 0.01  | 0.00  | 0.00  | 0.00  | 0.01    | 0.01  | 0.02  | 0.01   | 0.03  | 0.01  | 0.00  | 0.02  | 0.01  | 0.01  |

|                               |         |          |          |          |          |          |          |  |          |          |          |          |          |          |          |          |  |          |          |          |  |            |            |            |            |            |            |
|-------------------------------|---------|----------|----------|----------|----------|----------|----------|--|----------|----------|----------|----------|----------|----------|----------|----------|--|----------|----------|----------|--|------------|------------|------------|------------|------------|------------|
| O                             | Al      | 1.2<br>6 | 1.2<br>2 | 1.2<br>1 | 1.2<br>0 | 1.2<br>1 | 1.1<br>8 |  | 1.1<br>7 | 1.2<br>1 | 1.2<br>0 | 1.0<br>9 | 1.1<br>9 | 1.1<br>7 | 1.1<br>6 | 1.1<br>6 |  | 1.2<br>0 | 1.2<br>1 | 1.1<br>8 |  | 1.22       | 1.21       | 1.23       | 1.19       | 1.20       | 1.22       |
|                               | Su<br>m | 4.0<br>0 | 4.0<br>0 | 4.0<br>0 | 4.0<br>0 | 4.0<br>0 | 4.0<br>0 |  | 4.0<br>0 |  | 4.0<br>0 | 4.0<br>0 | 4.0<br>0 |  | 4.00       | 4.00       | 4.00       | 4.00       | 4.00       | 4.00       |
|                               | Al      | 1.2<br>2 | 1.2<br>4 | 1.2<br>4 | 1.2<br>5 | 1.2<br>2 | 1.2<br>4 |  | 1.1<br>8 | 1.1<br>7 | 1.1<br>8 | 1.2<br>3 | 1.2<br>0 | 1.1<br>4 | 1.2<br>1 | 1.1<br>8 |  | 1.2<br>5 | 1.2<br>2 | 1.2<br>4 |  | 1.23       | 1.22       | 1.21       | 1.24       | 1.22       | 1.24       |
|                               | Fe      | 3.1<br>6 | 3.1<br>5 | 3.2<br>5 | 3.3<br>0 | 3.2<br>8 | 3.2<br>4 |  | 3.3<br>0 | 3.2<br>6 | 3.3<br>4 | 2.8<br>4 | 3.5<br>2 | 3.1<br>8 | 3.2<br>2 | 2.9<br>9 |  | 3.3<br>0 | 3.2<br>8 | 3.2<br>4 |  | 3.32       | 3.37       | 3.42       | 3.32       | 3.29       | 3.37       |
|                               | Mg      | 1.4<br>8 | 1.5<br>1 | 1.4<br>2 | 1.3<br>4 | 1.3<br>9 | 1.3<br>9 |  | 1.3<br>4 | 1.3<br>2 | 1.3<br>1 | 1.6<br>3 | 1.1<br>3 | 1.4<br>8 | 1.3<br>0 | 1.5<br>7 |  | 1.3<br>4 | 1.3<br>9 | 1.3<br>9 |  | 1.35       | 1.31       | 1.24       | 1.31       | 1.36       | 1.26       |
|                               | Mn      | 0.0<br>5 | 0.0<br>6 | 0.0<br>6 | 0.0<br>5 | 0.0<br>6 | 0.0<br>5 |  | 0.1<br>5 | 0.1<br>6 | 0.1<br>5 | 0.2<br>0 | 0.1<br>1 | 0.1<br>5 | 0.1<br>6 | 0.2<br>2 |  | 0.0<br>5 | 0.0<br>6 | 0.0<br>5 |  | 0.06       | 0.05       | 0.05       | 0.05       | 0.06       | 0.06       |
|                               | su<br>m | 5.9<br>1 | 5.9<br>6 | 5.9<br>7 | 5.9<br>4 | 5.9<br>5 | 5.9<br>3 |  | 5.9<br>8 | 5.9<br>0 | 5.9<br>9 | 5.9<br>0 | 5.9<br>7 | 5.9<br>6 | 5.8<br>9 | 5.9<br>5 |  | 5.9<br>4 | 5.9<br>5 | 5.9<br>3 |  | 5.96       | 5.95       | 5.92       | 5.92       | 5.92       | 5.92       |
| OH                            | vac     | 0.0<br>9 | 0.0<br>4 | 0.0<br>3 | 0.0<br>6 | 0.0<br>5 | 0.0<br>7 |  | 0.0<br>2 | 0.1<br>0 | 0.0<br>1 | 0.1<br>0 | 0.0<br>3 | 0.0<br>4 | 0.1<br>1 | 0.0<br>5 |  | 0.0<br>6 | 0.0<br>5 | 0.0<br>7 |  | 0.04       | 0.05       | 0.08       | 0.08       | 0.08       | 0.08       |
|                               | F       | 0.1<br>0 | 0.0<br>0 | 0.0<br>0 | 0.0<br>0 | 0.0<br>0 | 0.0<br>0 |  | 0.0<br>0 | 0.0<br>7 | 0.0<br>0 | 0.0<br>0 | 0.0<br>0 | 0.0<br>3 | 0.0<br>0 | 0.0<br>0 |  | 0.0<br>0 | 0.0<br>0 | 0.0<br>0 |  | 0.00       | 0.00       | 0.05       | 0.00       | 0.04       | 0.04       |
|                               | Cl      | 0.0<br>0 | 0.0<br>0 | 0.0<br>0 | 0.0<br>0 | 0.0<br>0 | 0.0<br>0 |  | 0.0<br>0 |  | 0.0<br>0 | 0.0<br>0 | 0.0<br>0 |  | 0.00       | 0.00       | 0.00       | 0.00       | 0.00       | 0.00       |
|                               | OH<br>* | 7.6<br>9 | 8.0<br>0 | 8.0<br>0 | 7.9<br>9 | 8.0<br>0 | 8.0<br>0 |  | 8.0<br>0 | 7.7<br>8 | 8.0<br>0 | 7.9<br>9 | 8.0<br>0 | 7.9<br>0 | 7.9<br>9 | 8.0<br>0 |  | 7.9<br>9 | 8.0<br>0 | 8.0<br>0 |  | 7.99       | 8.00       | 7.84       | 8.00       | 7.89       | 7.89       |
| Fe# <sup>b</sup><br>T<br>(°C) |         | 0.6<br>8 | 0.6<br>8 | 0.7<br>0 | 0.7<br>1 | 0.7<br>0 | 0.7<br>0 |  | 0.7<br>1 | 0.7<br>1 | 0.7<br>2 | 0.6<br>4 | 0.7<br>6 | 0.6<br>8 | 0.7<br>1 | 0.6<br>6 |  | 0.7<br>1 | 0.7<br>0 | 0.7<br>0 |  | 0.71       | 0.72       | 0.73       | 0.72       | 0.71       | 0.73       |
| c                             |         | 345      | 331      | 329      | 324      | 327      | 318      |  | 313      | 327      | 326      | 290      | 321      | 313      | 311      | 311      |  | 324      | 327      | 318      |  | 329.<br>78 | 327.<br>49 | 335.<br>59 | 322.<br>69 | 325.<br>16 | 330.<br>73 |

<sup>a</sup> Atom per formula unit (apfu) representing the atomic proportions of elements in each crystallographic site (T= tetrahedral, O = octahedral, OH = OH site).

<sup>b</sup> Fe# = Fe/(Fe+Mg).

<sup>c</sup> [44].

**Table S2.** Whole rock geochemical data in weight % and ppm for the Cole, Welch and Dussault occurrences.

| Ana-lyte Sym-bol                   | Unit Sym-bol | Detect-ion Limit | Analysis Method | C- 01   | C- 02   | C- 03   | C- 04   | C- 05   | C- 06   | C- 09   | C- 10   | C- 11   | W- 01   | W- 03   | W- 04   | D- 03   | D- 04   | D- 05   |
|------------------------------------|--------------|------------------|-----------------|---------|---------|---------|---------|---------|---------|---------|---------|---------|---------|---------|---------|---------|---------|---------|
| Co <sub>3</sub> O <sub>4</sub>     | %            | 0.005            | FUS-XRF         | < 0.005 | < 0.005 | < 0.005 | < 0.005 | < 0.005 | < 0.005 | < 0.005 | < 0.005 | < 0.005 | < 0.005 | < 0.005 | < 0.005 | < 0.005 | < 0.005 | < 0.005 |
| CuO                                | %            | 0.005            | FUS-XRF         | < 0.005 | < 0.005 | < 0.005 | < 0.005 | < 0.005 | < 0.005 | < 0.005 | < 0.005 | < 0.005 | < 0.005 | < 0.005 | < 0.005 | 0.017   | < 0.005 | 0.177   |
| NiO                                | %            | 0.003            | FUS-XRF         | 0.005   | 0.004   | < 0.003 | < 0.003 | < 0.003 | 0.006   | < 0.003 | < 0.003 | < 0.003 | 0.007   | < 0.003 | 0.003   | 0.004   | < 0.003 | 0.005   |
| SiO <sub>2</sub>                   | %            | 0.01             | FUS-XRF         | 60.53   | 68.64   | 71.12   | 65.08   | 65.42   | 63.72   | 66.67   | 71.37   | 69.01   | 62.09   | 88.03   | 88.52   | 86.43   | 70.2    | 65.96   |
| Al <sub>2</sub> O <sub>3</sub>     | %            | 0.01             | FUS-XRF         | 16.44   | 14.39   | 14.37   | 15.4    | 13.05   | 16.33   | 13.43   | 13.83   | 14.43   | 18.05   | 5.48    | 5.25    | 6.3     | 14.1    | 14.16   |
| Fe <sub>2</sub> O <sub>3</sub> (T) | %            | 0.01             | FUS-XRF         | 4.75    | 3.93    | 2.24    | 6.49    | 3.71    | 5.55    | 3.13    | 2.13    | 3.98    | 5.66    | 2.42    | 2.85    | 1.97    | 5.13    | 6.51    |
| MnO                                | %            | 0.001            | FUS-XRF         | 0.062   | 0.035   | 0.016   | 0.022   | 0.07    | 0.056   | 0.062   | 0.021   | 0.046   | 0.07    | 0.033   | 0.047   | 0.032   | 0.059   | 0.056   |
| MgO                                | %            | 0.01             | FUS-XRF         | 2.02    | 1.23    | 0.71    | 1.28    | 1.85    | 2.02    | 1.23    | 0.59    | 1.74    | 1.81    | 0.61    | 0.71    | 0.41    | 1.28    | 1.49    |
| CaO                                | %            | 0.01             | FUS-XRF         | 2.27    | 0.41    | 0.44    | 0.47    | 3.83    | 1.82    | 3.16    | 0.63    | 0.95    | 0.22    | 0.06    | 0.1     | 0.16    | 0.26    | 0.13    |
| Na <sub>2</sub> O                  | %            | 0.01             | FUS-XRF         | 3.42    | 2.53    | 2.97    | 1.75    | 2.87    | 3.19    | 2.6     | 3.11    | 3.35    | 1.92    | 0.42    | 0.61    | 1.82    | 2.12    | 0.52    |
| K <sub>2</sub> O                   | %            | 0.01             | FUS-XRF         | 4.65    | 4.51    | 6.18    | 4.95    | 3.78    | 4.29    | 4.93    | 5.96    | 3.89    | 5.4     | 1.79    | 1.46    | 1.26    | 3.82    | 5.43    |
| TiO <sub>2</sub>                   | %            | 0.01             | FUS-XRF         | 0.6     | 0.59    | 0.2     | 0.43    | 0.27    | 0.72    | 0.44    | 0.18    | 0.4     | 0.54    | 0.19    | 0.21    | 0.18    | 0.59    | 0.45    |
| P <sub>2</sub> O <sub>5</sub>      | %            | 0.01             | FUS-XRF         | 0.2     | 0.2     | 0.21    | 0.15    | 0.1     | 0.22    | 0.14    | 0.05    | 0.15    | 0.14    | 0.04    | 0.05    | 0.1     | 0.17    | 0.1     |
| Cr <sub>2</sub> O <sub>3</sub>     | %            | 0.01             | FUS-XRF         | 0.02    | 0.01    | 0.01    | 0.01    | < 0.01  | 0.02    | < 0.01  | < 0.01  | < 0.01  | 0.02    | 0.01    | 0.01    | 0.01    | 0.01    | 0.02    |
| V <sub>2</sub> O <sub>5</sub>      | %            | 0.003            | FUS-XRF         | 0.014   | 0.012   | 0.011   | 0.011   | 0.008   | 0.013   | 0.008   | 0.01    | 0.008   | 0.019   | 0.005   | 0.008   | 0.003   | 0.01    | 0.021   |
| LOI                                | %            |                  | GRAV            | 3.68    | 2.43    | 1.16    | 3.44    | 5.13    | 2.65    | 3.32    | 1.73    | 2.59    | 3.2     | 1.06    | 1.17    | 1.04    | 2.16    | 3.72    |
| Total                              | %            | 0.01             | FUS-XRF         | 98.66   | 98.93   | 99.64   | 99.5    | 100.1   | 100.6   | 99.13   | 99.62   | 100.5   | 99.16   | 100.2   | 101     | 99.76   | 99.91   | 98.74   |
| B                                  | ppm          | 20               | TD-MS           | < 20    | < 20    | < 20    | < 20    | < 20    | < 20    | < 20    | < 20    | < 20    | < 20    | < 20    | < 20    | < 20    | < 20    | < 20    |
| Li                                 | ppm          | 0.5              | TD-MS           | 32.1    | 33.8    | 20.1    | 35.7    | 42.4    | 29.1    | 14.3    | 14.9    | 29.7    | 48.9    | 17.2    | 29.6    | 17.9    | 37.6    | 63.6    |
| Cd                                 | ppm          | 0.1              | TD-MS           | < 0.1   | < 0.1   | < 0.1   | < 0.1   | < 0.1   | < 0.1   | < 0.1   | 0.6     | < 0.1   | < 0.1   | < 0.1   | < 0.1   | < 0.1   | < 0.1   | < 0.1   |
| V                                  | ppm          | 1                | TD-MS           | 67      | 68      | 51      | 73      | 49      | 67      | 44      | 49      | 45      | 71      | 44      | 52      | 22      | 61      | 111     |
| Cr                                 | ppm          | 1                | TD-MS           | 26      | 20      | 19      | 21      | 20      | 44      | 19      | 12      | 23      | 57      | 52      | 51      | 43      | 61      | 69      |
| Mn                                 | ppm          | 1                | TD-MS           | 493     | 285     | 143     | 200     | 580     | 453     | 481     | 176     | 351     | 552     | 281     | 377     | 251     | 469     | 424     |
| Hf                                 | ppm          | 0.1              | TD-MS           | 7.7     | 2.8     | 1       | 0.9     | 5.3     | 7       | 8.2     | 1       | 4.9     | 1.9     | 0.4     | 0.6     | 1.5     | 4.2     | 2.6     |
| Ni                                 | ppm          | 0.5              | TD-MS           | 12.3    | 5       | 2.9     | 4       | 4.4     | 8.4     | 3.2     | 1.3     | 4.3     | 35.7    | 14      | 14.2    | 8.3     | 30.3    | 28.8    |

| Ana-lyte Sym-bol | Unit Sym-bol | Detect-ion Limit | Analysis Method | C- 01   | C- 02   | C- 03   | C- 04 | C- 05   | C- 06  | C- 09 | C- 10   | C- 11   | W- 01   | W- 03   | W- 04 | D- 03 | D- 04   | D- 05  |
|------------------|--------------|------------------|-----------------|---------|---------|---------|-------|---------|--------|-------|---------|---------|---------|---------|-------|-------|---------|--------|
| Er               | ppm          | 0.1              | TD-MS           | 1.6     | 1.6     | 1       | 4.9   | 1.5     | 2.8    | 1.2   | 0.6     | 1.1     | 1.4     | 0.9     | 1.1   | 1     | 2.4     | 1.9    |
| Be               | ppm          | 0.1              | TD-MS           | 2.5     | 2.9     | 1.5     | 6     | 2.8     | 2.7    | 1.7   | 1.3     | 2.5     | 5       | 1.4     | 1.3   | 1.7   | 4.5     | 5.2    |
| Ho               | ppm          | 0.1              | TD-MS           | 0.5     | 0.5     | 0.4     | 1.9   | 0.5     | 1      | 0.4   | 0.2     | 0.4     | 0.5     | 0.3     | 0.3   | 0.3   | 0.8     | 0.6    |
| Hg               | ppb          | 10               | TD-MS           | 30      | 40      | 40      | 80    | 160     | 40     | 40    | 60      | 30      | 20      | < 10    | 10    | 30    | 20      | 10     |
| Ag               | ppm          | 0.05             | TD-MS           | 0.1     | 2.81    | 0.16    | 41.3  | 13.1    | < 0.05 | 0.19  | 5.21    | 0.51    | 0.34    | 0.61    | 0.25  | 4.68  | 0.15    | 46.9   |
| Au               | ppb          | 0.02             | BLEG-MS         | 2.2     | 6       | 9.9     | 92    | 78      | 0.7    | 0.3   | 167     | 4.1     | 0.7     | 0.9     | 6     | 2     | 0.4     | 3.8    |
| Cs               | ppm          | 0.05             | TD-MS           | 2.1     | 2.25    | 1.13    | 4.72  | 2.23    | 1.75   | 0.96  | 1.06    | 1.97    | 14.3    | 3.59    | 2.82  | 4.46  | 13.4    | 12.6   |
| Co               | ppm          | 0.1              | TD-MS           | 10.1    | 6.4     | 4.3     | 4.8   | 8.6     | 11.7   | 7     | 2.2     | 6.4     | 15.6    | 6       | 6.1   | 3.9   | 11.2    | 13.6   |
| Eu               | ppm          | 0.05             | TD-MS           | 1.43    | 0.79    | 0.98    | 4.78  | 0.93    | 2.28   | 2.4   | 0.62    | 1.23    | 0.52    | 0.55    | 0.39  | 0.26  | 0.84    | 0.86   |
| Bi               | ppm          | 0.02             | TD-MS           | 0.12    | 21.1    | 1.38    | 188   | 57.8    | 0.36   | 0.62  | 3.37    | 2.22    | 62.8    | 32.3    | 37.6  | 46.8  | 1.34    | > 2000 |
| Se               | ppm          | 0.1              | TD-MS           | < 0.1   | 3.3     | 1       | 127   | 25.5    | < 0.1  | 0.3   | 2.9     | 0.5     | 1       | 4.3     | 1.5   | 1.5   | < 0.1   | 66.8   |
| Zn               | ppm          | 0.2              | TD-MS           | 54.3    | 30.1    | 7       | 25.6  | 48.9    | 65.2   | 38.8  | 18.5    | 43.6    | 70.7    | 29.8    | 38.6  | 24    | 48.2    | 51.7   |
| Ga               | ppm          | 0.1              | TD-MS           | 13.3    | 11.4    | 1.3     | 16.3  | 12.4    | 17     | 12.5  | 3.6     | 15.1    | 28.9    | 8.4     | 9.6   | 6.8   | 19.4    | 18.7   |
| As               | ppm          | 0.1              | TD-MS           | 4.6     | 13.6    | 2.9     | 53.2  | 33.6    | 3.4    | 3.5   | 7       | 6.4     | 1.2     | 0.7     | 0.8   | 2.3   | 2       | 7.1    |
| Rb               | ppm          | 0.2              | TD-MS           | 142     | 142     | 112     | 169   | 97.4    | 121    | 91.2  | 91.7    | 98.3    | 305     | 106     | 89.8  | 80.9  | 221     | 292    |
| Y                | ppm          | 0.1              | TD-MS           | 12.6    | 20.5    | 9.2     | 66.4  | 19.2    | 24.1   | 13    | 5       | 13.6    | 12.5    | 10.6    | 10.3  | 10.8  | 20.4    | 21.8   |
| Zr               | ppm          | 1                | TD-MS           | 312     | 143     | 32      | 97    | 178     | 291    | 351   | 117     | 199     | 66      | 16      | 21    | 58    | 214     | 91     |
| Nb               | ppm          | 0.1              | TD-MS           | 5.6     | 6.2     | 4.3     | 2.8   | 5.7     | 1.2    | 5.7   | 0.3     | 8.8     | 0.2     | 2.9     | 4.6   | 4.8   | 2.9     | 10.4   |
| Mo               | ppm          | 0.05             | TD-MS           | 0.88    | 0.7     | 0.91    | 1.05  | 0.75    | 0.61   | 0.77  | 0.87    | 0.81    | 0.13    | 1.17    | 1.5   | 2.24  | 0.46    | 0.68   |
| In               | ppm          | 0.1              | TD-MS           | < 0.1   | < 0.1   | < 0.1   | 0.1   | < 0.1   | < 0.1  | < 0.1 | < 0.1   | < 0.1   | < 0.1   | < 0.1   | < 0.1 | < 0.1 | < 0.1   | < 0.1  |
| Sn               | ppm          | 1                | TD-MS           | 1       | 1       | 2       | < 1   | < 1     | 2      | 1     | < 1     | 1       | 4       | 2       | 2     | 3     | 9       | 5      |
| Sb               | ppm          | 0.1              | TD-MS           | 1.7     | 4.5     | 2.5     | 8.6   | 9.5     | 0.2    | 1.5   | 5.2     | 5.6     | < 0.1   | 0.2     | 0.3   | 0.8   | 0.1     | 1.9    |
| Te               | ppm          | 0.1              | TD-MS           | < 0.1   | 2.1     | < 0.1   | 6.1   | 3.9     | < 0.1  | < 0.1 | 3       | 0.2     | 0.6     | 3.1     | 13.5  | 0.8   | < 0.1   | 22.2   |
| Ba               | ppm          | 1                | TD-MS           | 1610    | 1800    | 2970    | 1930  | 1440    | 1450   | 1860  | 3550    | 1250    | 1330    | 558     | 397   | 386   | 605     | 961    |
| La               | ppm          | 0.1              | TD-MS           | 104     | 34.4    | 36.2    | 42.2  | 30.5    | 148    | 321   | 96.2    | 46.5    | 28.5    | 16.3    | 16.3  | 11.1  | 62.5    | 26.9   |
| Ce               | ppm          | 0.1              | TD-MS           | 190     | 58.4    | 69.4    | 199   | 49.6    | 264    | 585   | 112     | 78.4    | 49.3    | 46.2    | 33.5  | 16.7  | 118     | 76.3   |
| Pr               | ppm          | 0.1              | TD-MS           | 21.4    | 6.7     | 8.7     | 26.6  | 6.3     | 29.7   | 60.7  | 11.1    | 7.7     | 4.2     | 6.9     | 4.2   | 1.9   | 13.5    | 10.7   |
| Nd               | ppm          | 0.1              | TD-MS           | 73.4    | 22.2    | 31.4    | 106   | 23.6    | 98     | 187   | 31      | 29      | 13.9    | 27.7    | 13.7  | 6.7   | 43.7    | 36.9   |
| Sm               | ppm          | 0.1              | TD-MS           | 10      | 4.2     | 5.8     | 22.9  | 3.9     | 13     | 22.1  | 4.3     | 6.7     | 3.3     | 2.9     | 2.3   | 2     | 7.5     | 5.2    |
| Gd               | ppm          | 0.1              | TD-MS           | 5.7     | 3.2     | 3.3     | 17.7  | 3.4     | 9.1    | 10.6  | 2.2     | 4.6     | 2.8     | 2.5     | 2     | 1.5   | 5.3     | 4.5    |
| Tb               | ppm          | 0.1              | TD-MS           | 0.5     | 0.4     | 0.4     | 1.8   | 0.4     | 0.9    | 0.7   | 0.2     | 0.4     | 0.4     | 0.3     | 0.3   | 0.2   | 0.6     | 0.4    |
| Dy               | ppm          | 0.1              | TD-MS           | 2.8     | 2.4     | 2       | 10.2  | 2.7     | 5.1    | 3.1   | 1.2     | 2.4     | 2.4     | 1.5     | 1.8   | 1.6   | 4.1     | 2.9    |
| Cu               | ppm          | 0.2              | TD-MS           | 7.6     | 7.6     | 14.2    | 9.7   | 7.5     | 1.9    | 3.3   | 12.4    | 6.8     | 26.3    | 16.8    | 11.1  | 144   | 19.2    | 1380   |
| Ge               | ppm          | 0.1              | TD-MS           | < 0.1   | 0.2     | < 0.1   | 0.4   | 0.2     | < 0.1  | < 0.1 | < 0.1   | 0.1     | 0.5     | 0.1     | 0.2   | 0.1   | 0.1     | 0.3    |
| Tm               | ppm          | 0.1              | TD-MS           | 0.2     | 0.2     | 0.1     | 0.5   | 0.2     | 0.3    | 0.1   | < 0.1   | 0.1     | 0.2     | 0.1     | 0.1   | 0.1   | 0.3     | 0.2    |
| Yb               | ppm          | 0.1              | TD-MS           | 1.2     | 1.4     | 0.8     | 2.9   | 1.3     | 2.3    | 0.8   | 0.6     | 0.8     | 1.5     | 0.7     | 1     | 1     | 2.2     | 1.6    |
| Lu               | ppm          | 0.1              | TD-MS           | 0.2     | 0.3     | 0.1     | 0.5   | 0.2     | 0.4    | 0.1   | 0.1     | 0.1     | 0.2     | 0.1     | 0.1   | 0.2   | 0.3     | 0.3    |
| Ta               | ppm          | 0.1              | TD-MS           | 0.1     | 0.3     | 0.1     | < 0.1 | 0.3     | < 0.1  | 0.1   | < 0.1   | 0.4     | < 0.1   | 0.2     | 0.4   | 0.6   | 0.3     | 0.9    |
| Sr               | ppm          | 0.2              | TD-MS           | 257     | 218     | 414     | 139   | 233     | 418    | 570   | 431     | 194     | 52      | 14      | 21.7  | 45.6  | 46.2    | 22     |
| W                | ppm          | 0.1              | TD-MS           | 0.5     | 1.3     | 0.8     | 1.1   | 0.7     | < 0.1  | 1     | 0.4     | 1.5     | < 0.1   | 0.5     | 0.4   | 1.5   | 0.7     | 2.3    |
| Re               | ppm          | 0.001            | TD-MS           | < 0.001 | < 0.001 | < 0.001 | 0.001 | < 0.001 | 0.001  | 0.001 | < 0.001 | < 0.001 | < 0.001 | < 0.001 | 0.001 | 0.002 | < 0.001 | 0.001  |
| Tl               | ppm          | 0.05             | TD-MS           | 0.84    | 0.89    | 0.77    | 1.17  | 0.63    | 0.79   | 0.61  | 0.71    | 0.62    | 2.12    | 0.7     | 0.58  | 0.45  | 1.49    | 2.01   |
| Pb               | ppm          | 0.5              | TD-MS           | 12.4    | 786     | 501     | 547   | 308     | 13.8   | 25.3  | 782     | 134     | 487     | 520     | 756   | 320   | 16.4    | 1590   |
| Th               | ppm          | 0.1              | TD-MS           | 22.3    | 20.8    | 1.6     | 13.8  | 30.3    | 20.4   | 58.5  | 39.6    | 14      | 21.1    | 5.7     | 10.6  | 10.2  | 39.7    | 14.4   |
| U                | ppm          | 0.1              | TD-MS           | 14.4    | 802     | 15.8    | 3480  | 1250    | 6.8    | 11.2  | 126     | 469     | 1510    | 711     | 1220  | 1530  | 15.7    | 2090   |

**Table S3.** Whole rock geochemical data in weight % and ppm for the Kult-82, Island and Pyramid occurrences.

| Analyte Symbol | Unit Symbol | Detection Limit | Analysis Method | K82-01 | K82-05 | K82-06 | K82-07 | K82-09 | K82-10 | I-01   | I-02   | I-03   | I-04  | I-05  | I-06  | I-08   | I-09   | I-10  | I-11   | I-12A  | I-12B  | I-13  | PY-02  | PY-05  |
|----------------|-------------|-----------------|-----------------|--------|--------|--------|--------|--------|--------|--------|--------|--------|-------|-------|-------|--------|--------|-------|--------|--------|--------|-------|--------|--------|
| Co3O4          | %           | 0.005           | FUS-XRF         | <0.005 | <0.005 | <0.005 | <0.005 | <0.005 | <0.005 | <0.005 | 0.006  | <0.005 | 0.006 | 0.007 | 0.006 | <0.005 | <0.005 | 0.005 | 0.005  | <0.005 | <0.005 | 0.009 | <0.005 | 0.001  |
| CuO            | %           | 0.005           | FUS-XRF         | 0.008  | 0.019  | 0.006  | 0.045  | 0.007  | 0.053  | 0.005  | 0.008  | 0.01   | 0.057 | 0.019 | 0.005 | <0.005 | 0.106  | 0.01  | 0.005  | 0.115  | 0.008  | 0.005 | 0.005  | 0.0047 |
| NiO            | %           | 0.003           | FUS-XRF         | <0.003 | <0.003 | <0.003 | <0.003 | <0.003 | <0.003 | <0.003 | <0.003 | <0.003 | 0.017 | 0.009 | 0.009 | <0.003 | 0.007  | 0.006 | <0.003 | <0.003 | 0.004  | 0.008 | <0.003 | <0.003 |
| SiO2           | %           | 0.01            | FUS-XRF         | 74.28  | 56.82  | 48.66  | 50.13  | 75.37  | 46.15  | 66.04  | 57.78  | 72.09  | 52.43 | 54.48 | 54.13 | 73.24  | 57.55  | 48.85 | 53.95  | 65.62  | 73.35  | 57.73 | 74.4   | 82.98  |
| Al2O3          | %           | 0.01            | FUS-XRF         | 12.58  | 18     | 19.12  | 12.13  | 12.93  | 16.49  | 15.49  | 13.81  | 10.09  | 14.99 | 13.69 | 13.72 | 13.07  | 14.31  | 13.98 | 13.4   | 13.1   | 10.65  | 12.53 | 13.05  | 4.6    |
| Fe2O3(T)       | %           | 0.01            | FUS-XRF         | 1.72   | 4.06   | 5.87   | 5.25   | 1.2    | 7.91   | 4.12   | 14.09  | 6.56   | 15.23 | 14.85 | 14.25 | 1.39   | 10.85  | 13.24 | 14.89  | 5.89   | 4.07   | 15.15 | 1      | 3.96   |
| MnO            | %           | 0.001           | FUS-XRF         | 0.017  | 0.058  | 0.109  | 0.233  | 0.012  | 0.144  | 0.027  | 0.223  | 0.141  | 0.261 | 0.342 | 0.241 | 0.021  | 0.186  | 0.22  | 0.242  | 0.104  | 0.09   | 0.226 | 0.009  | 0.044  |
| MgO            | %           | 0.01            | FUS-XRF         | 0.37   | 0.8    | 2.5    | 3.84   | 0.26   | 1.4    | 0.76   | 3.54   | 2.57   | 5.07  | 6.01  | 6.72  | 0.36   | 3.44   | 5.98  | 7.04   | 2.03   | 1.81   | 3.77  | 0.15   | 0.92   |
| CaO            | %           | 0.01            | FUS-XRF         | 0.1    | 5.01   | 7.16   | 11.31  | 0.13   | 7.49   | 0.83   | 0.28   | 0.28   | 0.56  | 0.47  | 0.37  | 0.64   | 0.29   | 9.28  | 0.32   | 0.55   | 0.52   | 0.21  | 0.36   | 1.14   |
| Na2O           | %           | 0.01            | FUS-XRF         | 3.19   | 7.59   | 5      | 2.18   | 3.24   | 4.94   | 3.7    | 4.08   | 1.52   | 3.7   | 1.21  | 2.12  | 3.06   | 1.94   | 3.06  | 1.53   | 1.79   | 2.94   | 2.77  | 2.57   | 0.12   |
| K2O            | %           | 0.01            | FUS-XRF         | 5.64   | 2.69   | 3.57   | 3.6    | 6.15   | 3.41   | 6.21   | 1.4    | 3.17   | 1.48  | 2.56  | 1.36  | 6.26   | 5.08   | 0.71  | 1.62   | 6.16   | 3      | 2.03  | 7.08   | 1.25   |
| TiO2           | %           | 0.01            | FUS-XRF         | 0.12   | 0.52   | 0.73   | 0.47   | 0.16   | 0.59   | 0.74   | 1.13   | 0.81   | 1.53  | 1.58  | 1.41  | 0.04   | 1.32   | 1.24  | 1.46   | 0.86   | 0.66   | 1.18  | 0.06   | 0.43   |
| P2O5           | %           | 0.01            | FUS-XRF         | 0.03   | 0.22   | 0.26   | 0.46   | 0.03   | 0.23   | 0.56   | 0.09   | 0.14   | 0.18  | 0.14  | 0.17  | 0.01   | 0.16   | 0.11  | 0.17   | 0.32   | 0.29   | 0.1   | 0.01   | 0.29   |
| Cr2O3          | %           | 0.01            | FUS-XRF         | 0.01   | <0.01  | <0.01  | 0.02   | <0.01  | <0.01  | <0.01  | 0.01   | <0.01  | 0.03  | 0.03  | 0.02  | 0.01   | 0.03   | 0.03  | 0.02   | <0.01  | 0.01   | 0.02  | 0.01   | <0.01  |
| V2O5           | %           | 0.003           | FUS-XRF         | 0.008  | 0.012  | 0.017  | 0.008  | 0.005  | 0.022  | 0.013  | 0.055  | 0.03   | 0.079 | 0.065 | 0.062 | 0.004  | 0.061  | 0.057 | 0.071  | 0.03   | 0.016  | 0.07  | 0.003  | 0.017  |
| LOI            | %           |                 | GRAV            | 0.87   | 4.42   | 7.57   | 10.66  | 0.55   | 7.93   | 1.45   | 3.52   | 2      | 3.68  | 4.77  | 4.77  | 1.3    | 3.47   | 2.62  | 4.53   | 1.82   | 1.65   | 3.22  | 0.69   | 2.2    |
| Total          | %           | 0.01            | FUS-XRF         | 98.93  | 100.2  | 100.6  | 100.3  | 100    | 96.76  | 99.95  | 100    | 99.42  | 99.29 | 100.2 | 99.38 | 99.42  | 98.82  | 99.35 | 99.25  | 98.4   | 99.06  | 99.02 | 99.38  | 98.5   |
| B              | ppm         | 20              | TD-MS           | <20    | <20    | <20    | <20    | <20    | 60     | <20    | <20    | 1.19   | 1.78  | <20   | <20   | <20    | <20    | <20   | 0.51   | <20    | <20    | 1.66  | <20    | 3910   |
| Li             | ppm         | 0.5             | TD-MS           | 7.2    | 13.6   | 33.9   | 36.2   | 4.4    | 124    | 15.1   | 44.6   | <20    | <20   | 72.6  | 73.3  | 5.5    | 43.5   | 18.7  | <20    | 29.6   | 29.9   | <20   | 2.5    | <20    |
| Na             | %           | 0.01            | TD-MS           | 2.46   | >3.00  | >3.00  | 1.47   | 2.33   | >3.00  | 2.55   | >3.00  | 45.2   | 53    | 0.83  | 1.42  | 2.27   | 1.34   | 1.99  | 75.1   | 1.3    | 2.17   | 42    | 2      | 46.3   |
| Mg             | %           | 0.01            | TD-MS           | 0.14   | 0.35   | 1.32   | 2.01   | 0.08   | 0.66   | 0.28   | 2.05   | 1.14   | 2.97  | 3.04  | 3.35  | 0.14   | 1.75   | 2.92  | 1.3    | 1.06   | 0.99   | 2.15  | 0.05   | 0.12   |
| Al             | %           | 0.01            | TD-MS           | 6.43   | 9.97   | 9.9    | 6.11   | 6.64   | 6.99   | 8.17   | 7.27   | 1.42   | 2.86  | 6.73  | 6.64  | 7.02   | 6.44   | 6.83  | 4.09   | 6.38   | 5.4    | 2.08  | 7.45   | 0.56   |
| K              | %           | 0.01            | TD-MS           | 3.36   | 2.59   | 3.3    | 3.16   | 3.59   | 2.2    | 4.75   | 1.19   | 5.31   | 7.88  | 1.98  | 1.16  | 4.58   | 4.41   | 0.56  | 7.34   | 3.09   | 1.99   | 6.66  | >5.00  | 2.5    |
| Ca             | %           | 0.01            | TD-MS           | 0.08   | 3.58   | 5.05   | 7.77   | 0.09   | 5.03   | 0.57   | 0.16   | 1.57   | 1.14  | 0.32  | 0.22  | 0.45   | 0.2    | 6.05  | 1.38   | 0.38   | 0.36   | 1.7   | 0.27   | 1.07   |
| Cd             | ppm         | 0.1             | TD-MS           | <0.1   | <0.1   | <0.1   | <0.1   | <0.1   | <0.1   | <0.1   | <0.1   | 0.17   | 0.36  | 0.3   | <0.1  | <0.1   | <0.1   | 0.1   | 0.22   | 0.2    | 0.9    | 0.15  | <0.1   | 0.82   |
| V              | ppm         | 1               | TD-MS           | 31     | 49     | 69     | 48     | 22     | 105    | 49     | 308    | 0.1    | <0.1  | 182   | 120   | 10     | 120    | 259   | <0.1   | 119    | 62     | 0.3   | 4      | <0.1   |

| Ana-lyte Sym-bol | Unit Sym-bol | Detec-tion Limit | Analy-sis Metho-d | K82 -01 | K82 -05 | K82 -06 | K82 -07 | K82 -09 | K82 -10 | I-01  | I-02  | I-03  | I-04  | I-05  | I-06 | I-08  | I-09 | I-10 | I-11  | I-12A | I-12B | I-13 | PY-02 | PY-05 |
|------------------|--------------|------------------|-------------------|---------|---------|---------|---------|---------|---------|-------|-------|-------|-------|-------|------|-------|------|------|-------|-------|-------|------|-------|-------|
| Cr               | ppm          | 1                | TD-MS             | 16      | 15      | 12      | 86      | 11      | 38      | 11    | 150   | 119   | 233   | 138   | 127  | 11    | 122  | 111  | 234   | 56    | 18    | 202  | 14    | 97    |
| Mn               | ppm          | 1                | TD-MS             | 130     | 462     | 841     | 1830    | 94      | 1150    | 220   | 1750  | 64    | 129   | 2530  | 1820 | 165   | 1360 | 1630 | 117   | 820   | 675   | 114  | 92    | 28    |
| Fe               | %            | 0.01             | TD-MS             | 1.22    | 2.88    | 4.04    | 3.61    | 0.75    | 5.58    | 2.79  | 9.77  | 1080  | 1990  | 9.68  | 9.47 | 0.94  | 7.09 | 8.63 | 1870  | 4.08  | 2.85  | 1680 | 0.7   | 343   |
| Hf               | ppm          | 0.1              | TD-MS             | 4.8     | 6.5     | 5.1     | 3.5     | 2       | 5       | 0.4   | 2.2   | 4.47  | 10.4  | 3.4   | 1.5  | 4.7   | 2    | 1.8  | 10.7  | 3.2   | 0.9   | 10.2 | 2.3   | 2.88  |
| Ni               | ppm          | 0.5              | TD-MS             | 1.6     | 6.7     | 6.7     | 94.6    | 1.6     | 32      | 4.4   | 39.7  | 3     | 3.2   | 61.8  | 54.9 | 2.1   | 30   | 52.9 | 3.1   | 17.4  | 7.2   | 1.5  | 0.9   | 0.2   |
| Er               | ppm          | 0.1              | TD-MS             | 0.6     | 7.7     | 2.3     | 4       | 0.8     | 3.5     | 1.4   | 3.8   | 32.9  | 76.2  | 6.6   | 4.1  | 1.1   | 5.1  | 2.9  | 67.3  | 2.7   | 1.7   | 70.3 | 0.3   | 23.6  |
| Be               | ppm          | 0.1              | TD-MS             | 0.6     | 5.5     | 2.8     | 1.5     | 0.5     | 3.7     | 2     | 2.8   | 4.2   | 3.4   | 5.4   | 2.5  | 1.1   | 2.4  | 0.5  | 5.1   | 2.6   | 1.6   | 3.9  | 0.8   | 2.7   |
| Ho               | ppm          | 0.1              | TD-MS             | 0.2     | 2.8     | 0.8     | 1.4     | 0.3     | 1.3     | 0.5   | 1.3   | 2.8   | 2.9   | 2.3   | 1.4  | 0.3   | 1.7  | 1    | 2.2   | 1     | 0.6   | 2.5  | <0.1  | 1.9   |
| Hg               | ppb          | 10               | TD-MS             | 10      | 10      | 20      | 30      | 20      | 30      | 30    | 50    | 1.6   | 1.2   | 20    | 10   | 20    | 20   | 20   | 2     | 20    | 20    | 1.4  | 20    | 0.9>  |
| Ag               | ppm          | 0.05             | TD-MS             | 0.46    | 0.39    | 0.14    | 0.25    | 0.24    | 5.15    | 0.36  | 1.93  | 0.6   | 0.47  | 0.24  | 1.24 | 0.11  | 2.6  | 0.24 | 0.38  | 1.17  | 2.33  | 1.6  | 0.06  | 100   |
| Au               | ppb          | 0.02             | BLEG-MS           | 63.8    | 7.7     | 3.7     | 1.5     | 2       | 67      | 0.2   | 25    | nd    | nd    | 0.4   | 0.7  | 0.1   | nd   | 0.5  | nd    | 4     | 3     | nd   | nd    | nd    |
| Cs               | ppm          | 0.05             | TD-MS             | 0.49    | 0.81    | 2.05    | 0.61    | 0.48    | 16.8    | 1.29  | 0.3   | 0.5   | 0.3   | 0.43  | 0.33 | 0.81  | 0.71 | 0.48 | 0.4   | 1.07  | 0.42  | 0.32 | 0.74  | 1.89  |
| Co               | ppm          | 0.1              | TD-MS             | 4.2     | 7.2     | 12.2    | 13.8    | 1.5     | 18      | 5.4   | 42.1  | 19.6  | 43.4  | 44.6  | 48.5 | 3.2   | 38.6 | 43.1 | 32.4  | 23.3  | 16.6  | 56.9 | 0.9   | 80.8  |
| Eu               | ppm          | 0.05             | TD-MS             | 1.28    | 2.12    | 1.83    | 2.66    | 1.06    | 1.93    | 4.34  | 3.68  | 3.17  | 1.75  | 2.97  | 1.28 | 0.21  | 1.92 | 1.23 | 1.8   | 3     | 2.79  | 2.29 | 0.44  | 2.01  |
| Bi               | ppm          | 0.02             | TD-MS             | 2.13    | 0.98    | 0.38    | 0.37    | 1.75    | 34      | 1.82  | 32.1  | 10.3  | 11.7  | 10.2  | 27.5 | 0.42  | 16.2 | 0.13 | 15.7  | 18.2  | 21.7  | 40.9 | 0.05  | 522   |
| Se               | ppm          | 0.1              | TD-MS             | 0.4     | <0.1    | 0.2     | <0.1    | 0.4     | 7       | <0.1  | 1.9   | <0.1  | 0.4   | <0.1  | <0.1 | 0.4   | 0.7  | <0.1 | <0.1  | 0.3   | 0.3   | 0.7  | 0.3   | 10.9  |
| Zn               | ppm          | 0.2              | TD-MS             | <0.2    | 17.9    | 73.6    | 117     | 1.4     | <0.2    | 8.5   | 213   | 110   | 295   | 395   | 432  | <0.2  | 147  | 157  | 388   | 95.6  | 86.6  | 247  | 11    | 26.7  |
| Ga               | ppm          | 0.1              | TD-MS             | 5.3     | 14      | 23.5    | 13      | 6.2     | <0.1    | 3.8   | 20.1  | <0.1  | 20.1  | 20.5  | 18.7 | 5.5   | 23.5 | 17   | 8.6   | <0.1  | 0.9   | 21.5 | 18.8  | 11.1  |
| As               | ppm          | 0.1              | TD-MS             | 3.3     | 2       | 0.7     | 2       | 1.1     | 42.1    | 1.3   | 9.8   | 1.5   | 1.6   | 1     | 1.7  | 1.9   | 5.9  | 14.5 | 0.2   | 5.3   | 3     | 5.1  | 0.9   | 9.3   |
| Rb               | ppm          | 0.2              | TD-MS             | 80.9    | 67.9    | 145     | 67.5    | 87.1    | 108     | 161   | 36.3  | 69.7  | 40.4  | 72    | 38.7 | 147   | 133  | 23.7 | 45.7  | 146   | 61.8  | 56.2 | 181   | 70.3  |
| Y                | ppm          | 0.1              | TD-MS             | 8.1     | 55.6    | 20.2    | 35      | 7       | 31.5    | 14.9  | 42.9  | 41    | 34.2  | 55.2  | 38.3 | 8.4   | 51.2 | 22.7 | 48.6  | 28.7  | 20.2  | 40.9 | 1.9   | 42    |
| Zr               | ppm          | 1                | TD-MS             | 168     | 249     | 219     | 153     | 117     | 204     | 57    | 82    | 97    | 103   | 128   | 59   | 122   | 70   | 65   | 99    | 171   | 63    | 41   | 67    | 10    |
| Nb               | ppm          | 0.1              | TD-MS             | 1.3     | 11.5    | 3.9     | 8       | 0.6     | 6.7     | 0.7   | 3     | 0.5   | 0.2   | 0.1   | 0.2  | 1.7   | 1.4  | 1.1  | 0.2   | 2.1   | 1.2   | 0.4  | 2.8   | 0.7   |
| Mo               | ppm          | 0.05             | TD-MS             | 1.53    | 0.34    | 0.09    | 0.81    | 1       | 0.18    | 2.68  | 0.93  | 0.42  | <0.05 | 0.11  | 0.09 | 1.17  | 0.19 | 0.56 | <0.05 | 1.01  | 1.01  | 0.07 | 1.73  | 0.69  |
| In               | ppm          | 0.1              | TD-MS             | <0.1    | <0.1    | <0.1    | <0.1    | <0.1    | <0.1    | <0.1  | <0.1  | <0.1  | <0.1  | 0.1   | <0.1 | <0.1  | <0.1 | <0.1 | <0.1  | <0.1  | <0.1  | <0.1 | <0.1  | <0.1  |
| Sn               | ppm          | 1                | TD-MS             | <1      | 3       | <1      | 1       | <1      | 1       | <1    | <1    | <1    | <1    | <1    | <1   | <1    | 1    | <1   | <1    | <1    | <1    | <1   | <1    | <1    |
| Sb               | ppm          | 0.1              | TD-MS             | 5.6     | 1.3     | 1.3     | 1.7     | 4.5     | 6.3     | 0.1   | 0.7   | <0.1  | <0.1  | <0.1  | <0.1 | 0.6   | 0.2  | 0.2  | <0.1  | 2     | 0.8   | 0.4  | 1.5   | 15.6  |
| Te               | ppm          | 0.1              | TD-MS             | 0.6     | <0.1    | <0.1    | <0.1    | 1       | 1       | <0.1  | 1.1   | <0.1  | <0.1  | <0.1  | <0.1 | <0.1  | 0.1  | <0.1 | <0.1  | 0.5   | 1.2   | 0.1  | <0.1  | 327   |
| Ba               | ppm          | 1                | TD-MS             | 2900    | 1650    | 1310    | 2290    | 2300    | 4250    | >5000 | >2970 | >5000 | >2230 | >5000 | 1970 | >5000 | 194  | 320  | 3050  | 4490  | 3860  | 451  | 558   | 585   |
| La               | ppm          | 0.1              | TD-MS             | 84.5    | 50      | 64.6    | 60.2    | 93.7    | 48.3    | 252   | 98.6  | 72.7  | 15.8  | 52.2  | 20.5 | 3.3   | 13.8 | 9.7  | 12.4  | 104   | 132   | 32.7 | 5.6   | 57.8  |
| Ce               | ppm          | 0.1              | TD-MS             | 156     | 111     | 122     | 124     | 156     | 106     | 485   | 208   | 142   | 39.9  | 90.8  | 34.1 | 6.7   | 37.8 | 18.7 | 32.6  | 207   | 251   | 67.2 | 9.1   | 114   |
| Pr               | ppm          | 0.1              | TD-MS             | 19.3    | 16.3    | 15.4    | 17.3    | 15.9    | 13.5    | 56.7  | 24.2  | 17.1  | 5.2   | 11.5  | 4.4  | 0.9   | 5.7  | 2.7  | 5     | 24.5  | 29.8  | 8.2  | 1.1   | 13    |
| Nd               | ppm          | 0.1              | TD-MS             | 65.7    | 72      | 53.5    | 68.4    | 47.2    | 50.8    | 200   | 85.6  | 61.3  | 21.8  | 41.6  | 19.1 | 3.7   | 25.8 | 12.1 | 22.3  | 87    | 102   | 31.8 | 3.9   | 52.4  |
| Sm               | ppm          | 0.1              | TD-MS             | 8.9     | 18      | 9.5     | 13.7    | 5.8     | 9.6     | 22.4  | 13.2  | 11.7  | 4.7   | 9.7   | 5.5  | 1.2   | 7.4  | 3.3  | 5.4   | 15    | 11.8  | 5.8  | 0.8   | 7.1   |

| Ana-lyte Sym-bol | Unit Sym-bol | Detection Limit | Analy-sis Method | K82 - 01    | K82 - 05    | K82 - 06    | K82 - 07    | K82 - 09    | K82 - 10    | I- 01     | I- 02       | I-03      | I-04      | I- 05     | I- 06       | I- 08       | I- 09     | I- 10     | I-11        | I- 12A    | I- 12B    | I-13        | PY- 02      | PY -05    |
|------------------|--------------|-----------------|------------------|-------------|-------------|-------------|-------------|-------------|-------------|-----------|-------------|-----------|-----------|-----------|-------------|-------------|-----------|-----------|-------------|-----------|-----------|-------------|-------------|-----------|
| Gd               | ppm          | 0.1             | TD-MS            | 5.4         | 14.6        | 6.7         | 10.5        | 3.9         | 7.5         | 11.1      | 10.6        | 9.8       | 5.8       | 10.1      | 5.8         | 1.2         | 8.1       | 3.8       | 7.9         | 10.4      | 8.4       | 7.2         | 0.5         | 6.5       |
| Tb               | ppm          | 0.1             | TD-MS            | 0.4         | 2.1         | 0.7         | 1.3         | 0.3         | 1           | 0.8       | 1.3         | 1.4       | 1         | 1.5       | 0.9         | 0.2         | 1.1       | 0.6       | 1.4         | 1         | 0.7       | 1.1         | < 0.1       | 0.7       |
| Dy               | ppm          | 0.1             | TD-MS            | 1.7         | 13.5        | 4.2         | 7.4         | 1.5         | 6.3         | 3.5       | 7           | 7.7       | 5.9       | 10.8      | 6.4         | 1.4         | 7.8       | 4.2       | 9           | 5.5       | 3.4       | 7           | 0.3         | 4.1       |
| Cu               | ppm          | 0.2             | TD-MS            | 70.1        | 128         | 39.7        | 331         | 44.7        | 400         | 16.8      | 57.9        | 91.4      | 446       | 153       | 35.2        | 5.8         | 773       | 73.9      | 20.7        | 886       | 62.4      | 36.6        | 6.3         | 52<br>40  |
| Ge               | ppm          | 0.1             | TD-MS            | < 0.1       | < 0.1       | 0.4         | < 0.1       | < 0.1       | < 0.1       | < 0.1     | < 0.1       | < 0.1     | < 0.1     | < 0.3     | 0.1         | 0.2         | 0.4       | 0.2       | 0.1         | < 0.1     | 0.1       | 0.2         | 0.2         |           |
| Tm               | ppm          | 0.1             | TD-MS            | < 0.1       | 0.8         | 0.3         | 0.5         | < 0.1       | 0.4         | 0.2       | 0.5         | 0.6       | 0.5       | 0.8       | 0.5         | 0.1         | 0.6       | 0.3       | 0.7         | 0.3       | 0.2       | 0.5         | < 0.1       | 0.4       |
| Yb               | ppm          | 0.1             | TD-MS            | 0.4         | 5.3         | 1.9         | 3           | 0.5         | 2.8         | 1         | 3.1         | 3.7       | 3.4       | 5.6       | 3.6         | 0.9         | 4.5       | 2.5       | 5.3         | 1.9       | 1.3       | 3.6         | 0.2         | 2.8       |
| Lu               | ppm          | 0.1             | TD-MS            | < 0.1       | 0.7         | 0.3         | 0.4         | 0.1         | 0.4         | 0.2       | 0.5         | 0.5       | 0.5       | 0.8       | 0.5         | 0.2         | 0.7       | 0.4       | 0.8         | 0.3       | 0.3       | 0.5         | < 0.1       | 0.5       |
| Ta               | ppm          | 0.1             | TD-MS            | < 0.1       | 0.2         | 0.1         | 0.3         | < 0.1       | 0.2         | < 0.1     | < 0.1       | 0.1       | < 0.1     | < 0.1     | < 0.1       | 0.2         | < 0.1     | < 0.1     | < 0.1       | < 0.1     | < 0.1     | < 0.1       | 0.1         | < 0.1     |
| Sr               | ppm          | 0.2             | TD-MS            | 156         | 754         | 799         | 916         | 153         | 648         | 132<br>0  | 175         | 132       | 154       | 107       | 144         | 200         | 150       | 607       | 129         | 165       | 182       | 154         | 178         | 77.<br>1  |
| W                | ppm          | 0.1             | TD-MS            | 1.1         | 0.1         | 0.2         | 0.3         | 0.5         | 0.1         | 0.6       | 0.3         | 0.2       | < 0.1     | < 0.1     | < 0.1       | < 0.1       | < 0.1     | < 0.1     | < 0.1       | 0.6       | 0.3       | 0.1         | 0.2         | 1.3       |
| Re               | ppm          | 0.001           | TD-MS            | < 0.00<br>1 | 0.00<br>1 | < 0.00<br>1 | 0.00<br>1 | 0.00<br>2 | 0.00<br>1 | < 0.00<br>1 | < 0.00<br>1 | 0.00<br>2 | 0.00<br>1 | < 0.00<br>1 | 0.00<br>1 | 0.00<br>2 | < 0.00<br>1 | < 0.00<br>1 | 0.0<br>27 |
| Tl               | ppm          | 0.05            | TD-MS            | 0.67        | 0.4         | 0.77        | 0.44        | 0.66        | 0.78        | 1.3       | 0.44        | 0.71      | 0.41      | 0.64      | 0.37        | 1.25        | 1.68      | 0.17      | 0.48        | 1.53      | 0.61      | 0.57        | 1.22        | 0.4<br>3  |
| Pb               | ppm          | 0.5             | TD-MS            | 137         | 45.2        | 16.8        | 11.9        | 509         | 296<br>0    | 174       | 118<br>0    | 190       | 256       | 157       | 498         | 51.8        | 138       | 17.1      | 356         | 332       | 137<br>0  | 103<br>0    | 27          | 14<br>90  |
| Th               | ppm          | 0.1             | TD-MS            | 33          | 2.6         | 8.1         | 11.2        | 34          | 5.4<br>>    | 31.9      | 2.4         | 9.2       | 3.2       | 5         | 2.8         | 42.7        | 1.3       | 1.3       | 3           | 5.9       | 7.6       | 1.7         | 55.1        | 2.4       |
| U                | ppm          | 0.1             | TD-MS            | 197         | 18.4        | 13.5        | 2.2         | 78.1        | 100<br>00   | 48.2      | 240<br>0    | 401       | 356       | 206       | 975         | 17.4        | 834       | 4.1       | 669         | 788       | 741       | 221<br>0    | 3.7         | 72<br>20  |
